# Supplementary material for: Lipase-mediated synthesis of sugar–PEG-based amphiphiles for encapsulation and stabilization of indocyanine green
Source: Royal Society of Chemistry journal article supplement (doi:10.1039/c7ra04994c), 2017-01-01

## SUPPORTING INFORMATION

### Lipase-mediated Synthesis of Sugar-PEG-based Amphiphiles for Encapsulation and Stabilization of Indocyanine Green

Vinod Khatri,<sup>a</sup> Sumati Bhatia,<sup>b</sup> Katharina Achazi,<sup>b</sup> Satyanarayan Deep,<sup>a,c</sup> Ekta Kohli,<sup>c</sup>  
Sunil K. Sharma,<sup>a</sup> Rainer Haag<sup>b</sup> and Ashok K. Prasad<sup>a\*</sup>

#### Contents

|                                                                                                               |     |
|---------------------------------------------------------------------------------------------------------------|-----|
| <sup>1</sup> H and <sup>13</sup> C NMR spectra of copolymer 3                                                 | S2  |
| ( <sup>1</sup> H- <sup>13</sup> C) HSQC and DEPT-135 NMR spectra of copolymer 3                               | S3  |
| <sup>1</sup> H and <sup>13</sup> C NMR spectra of copolymer 4                                                 | S4  |
| ( <sup>1</sup> H- <sup>1</sup> H) COSY and ( <sup>1</sup> H- <sup>13</sup> C) HSQC-NMR spectra of copolymer 4 | S5  |
| <sup>1</sup> H- and <sup>13</sup> C NMR spectra of copolymer 5                                                | S6  |
| ( <sup>1</sup> H- <sup>1</sup> H) COSY and ( <sup>1</sup> H- <sup>13</sup> C) HSQC-NMR spectra of copolymer 5 | S7  |
| <sup>1</sup> H and <sup>13</sup> C NMR spectra of copolymer 6                                                 | S8  |
| ( <sup>1</sup> H- <sup>13</sup> C) HSQC and DEPT-135 NMR spectra of copolymer 6                               | S9  |
| <sup>1</sup> H and <sup>13</sup> C NMR spectra of copolymer 7                                                 | S10 |
| Molecular Weight of copolymers 3-7                                                                            | S11 |
| Zeta potential data of Nile red and ICG loaded micelles of copolymer 4 and 5                                  | S11 |
| Dynamic Light Scattering (DLS) data of copolymers 4-6                                                         | S12 |
| Dynamic Light Scattering (DLS) data of ICG loaded copolymers 4-6                                              | S13 |
| Dynamic Light Scattering (DLS) data of copolymers 4-6 after 15 days incubation                                | S14 |
| Dynamic Light Scattering (DLS) data of Nile red loaded copolymers 4 and 5                                     | S14 |
| Cytotoxicity data of copolymers 4, 5, and 6                                                                   | S15 |
| GPC data of copolymer 3                                                                                       | S16 |
| GPC data of copolymer 4                                                                                       | S17 |
| GPC data of copolymer 5                                                                                       | S18 |
| GPC data of copolymer 6                                                                                       | S19 |
| GPC data of copolymer 7                                                                                       | S20 |

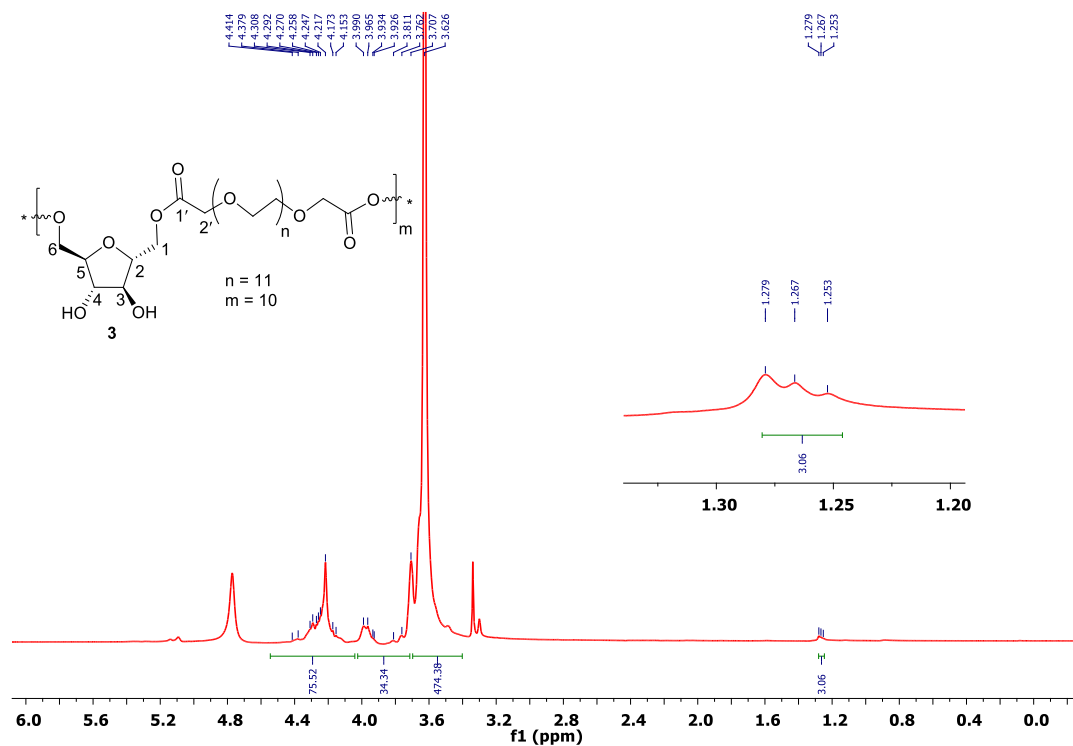

**Figure S1.**  $^1\text{H}$  NMR spectrum (500 MHz,  $\text{CD}_3\text{OD}$ ) of copolymer **3**.

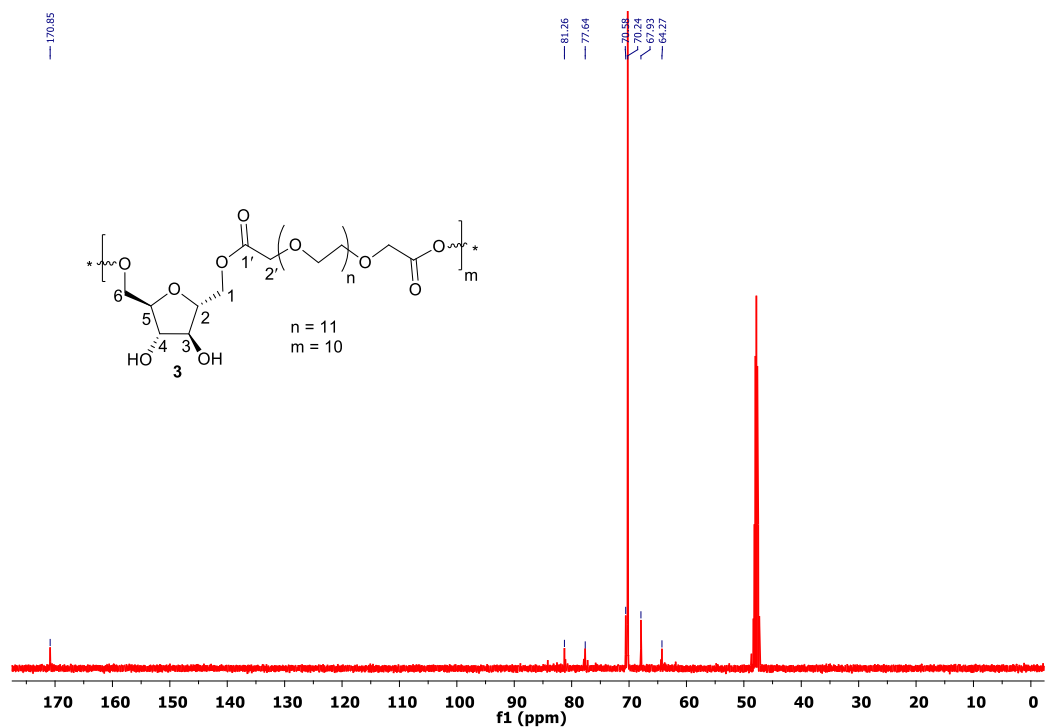

**Figure S2.**  $^{13}\text{C}$  NMR spectrum (125 MHz,  $\text{CD}_3\text{OD}$ ) of copolymer **3**.

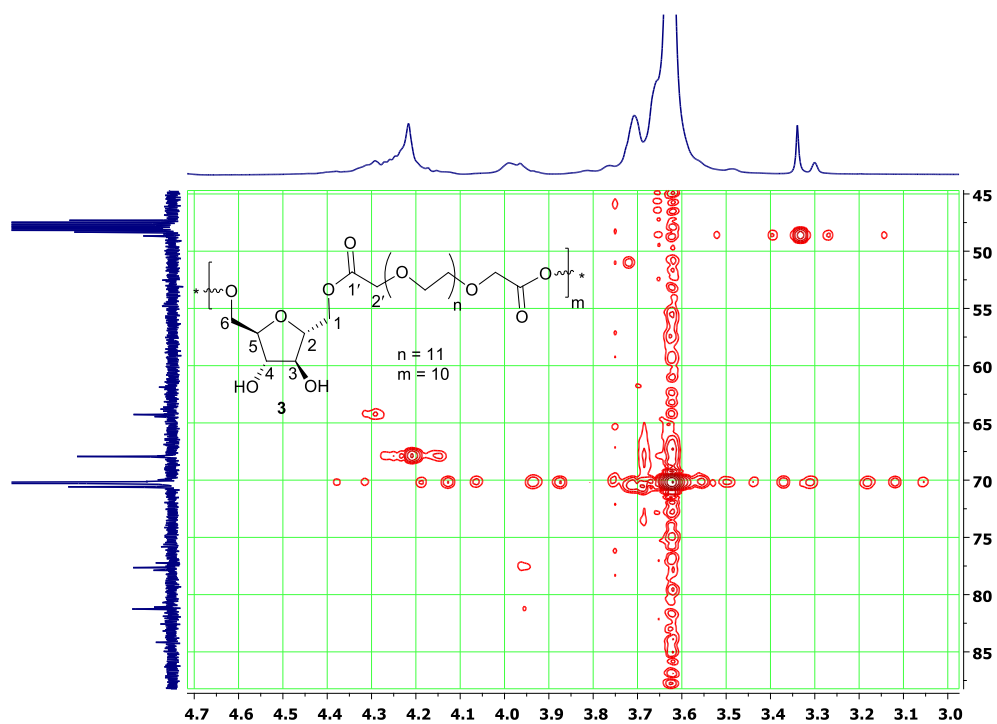

Figure S3. ( $^1\text{H}$ - $^{13}\text{C}$ ) HSQC spectrum (500 MHz,  $\text{CD}_3\text{OD}$ ) of copolymer **3**.

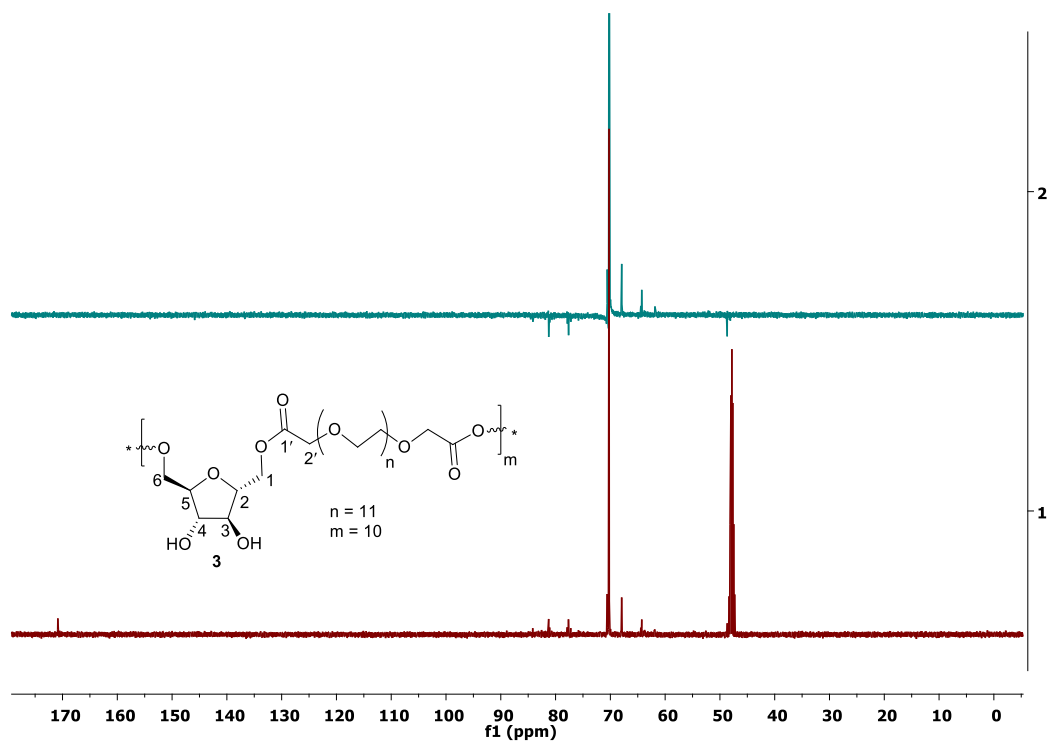

Figure S4. DEPT-135 NMR spectrum (125 MHz,  $\text{CD}_3\text{OD}$ ) of copolymer **3**.

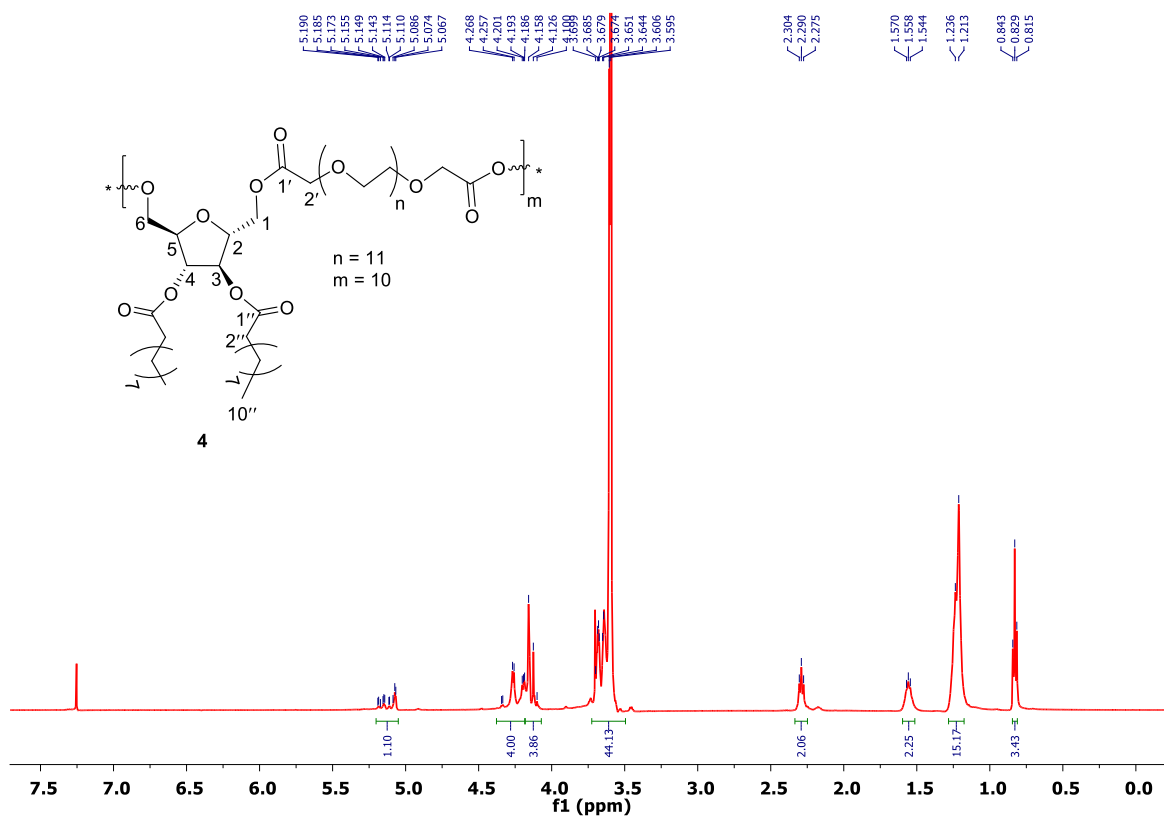

Figure S5.  $^1\text{H}$  NMR spectrum (500 MHz,  $\text{CDCl}_3$ ) of copolymer 4.

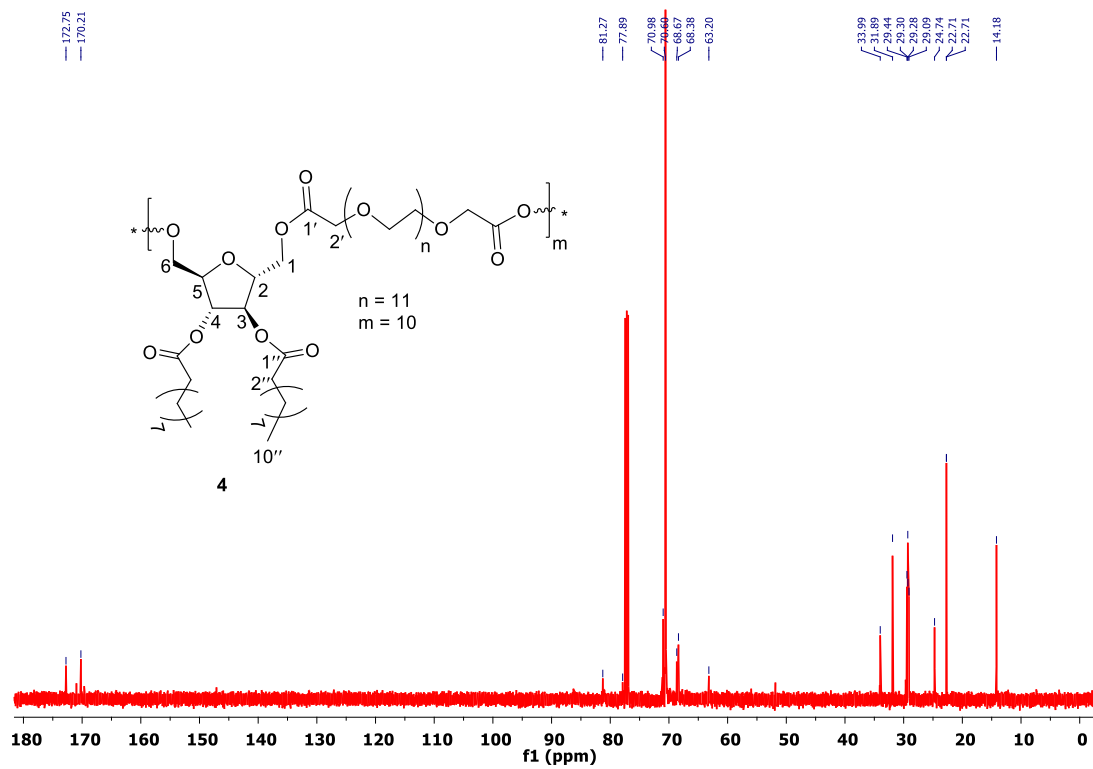

Figure S6.  $^{13}\text{C}$  NMR spectrum (125 MHz,  $\text{CDCl}_3$ ) of copolymer 4.

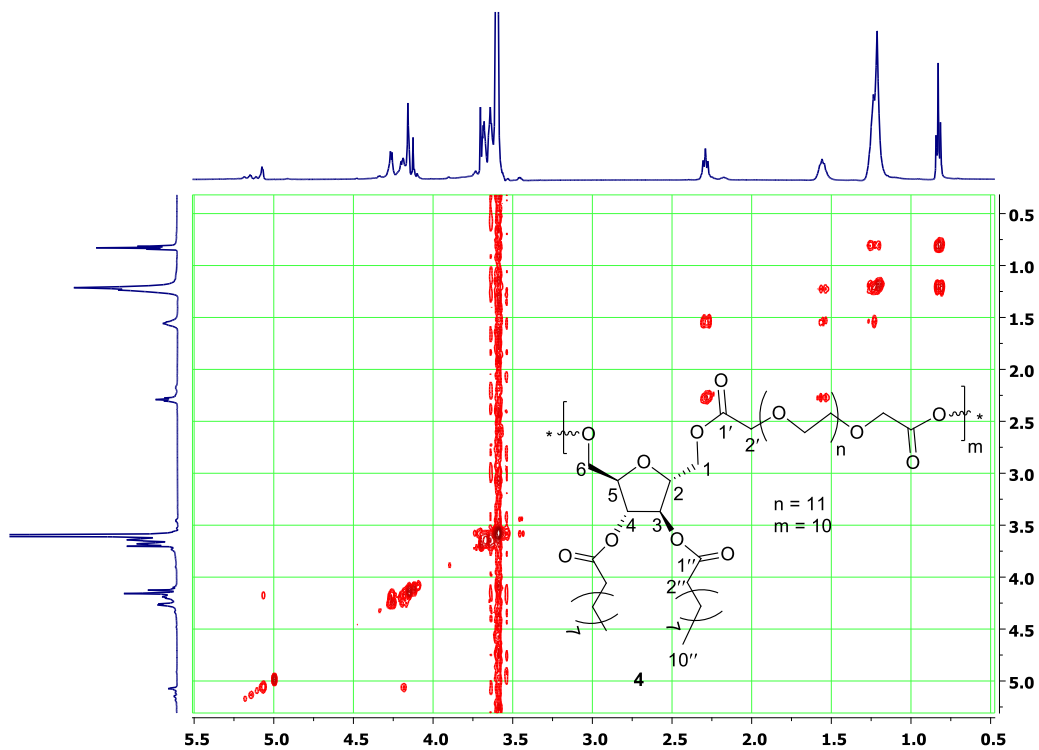

**Figure S7.** ( $^1\text{H}$ - $^1\text{H}$ ) COSY spectrum (500 MHz,  $\text{CDCl}_3$ ) of copolymer **4**.

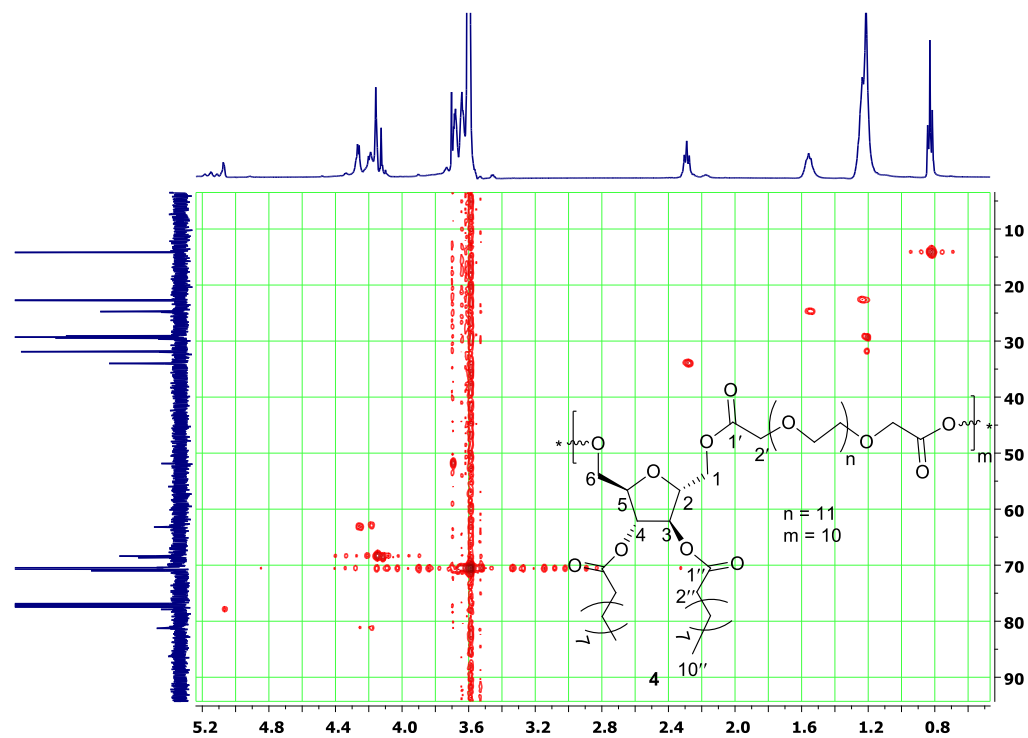

**Figure S8.** ( $^1\text{H}$ - $^{13}\text{C}$ ) HSQC spectrum (500 MHz,  $\text{CDCl}_3$ ) of copolymer **4**.

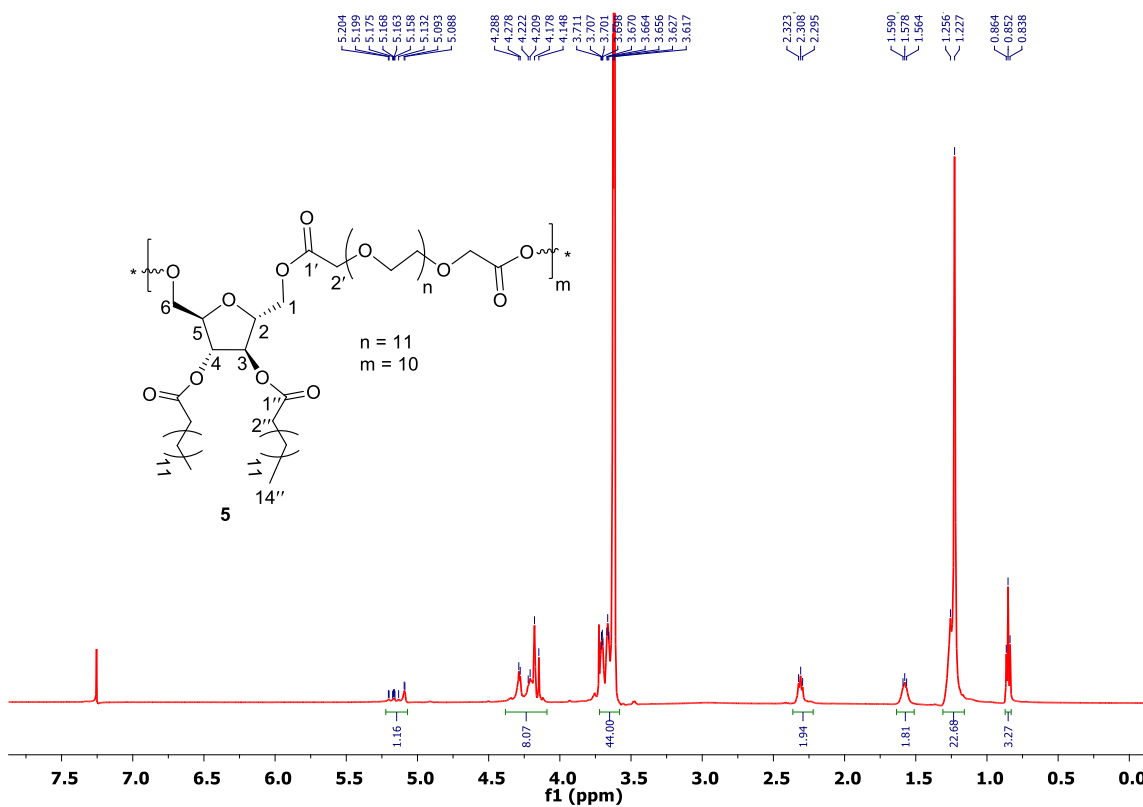

Figure S9.  $^1\text{H}$  NMR spectrum (500 MHz,  $\text{CDCl}_3$ ) of copolymer 5.

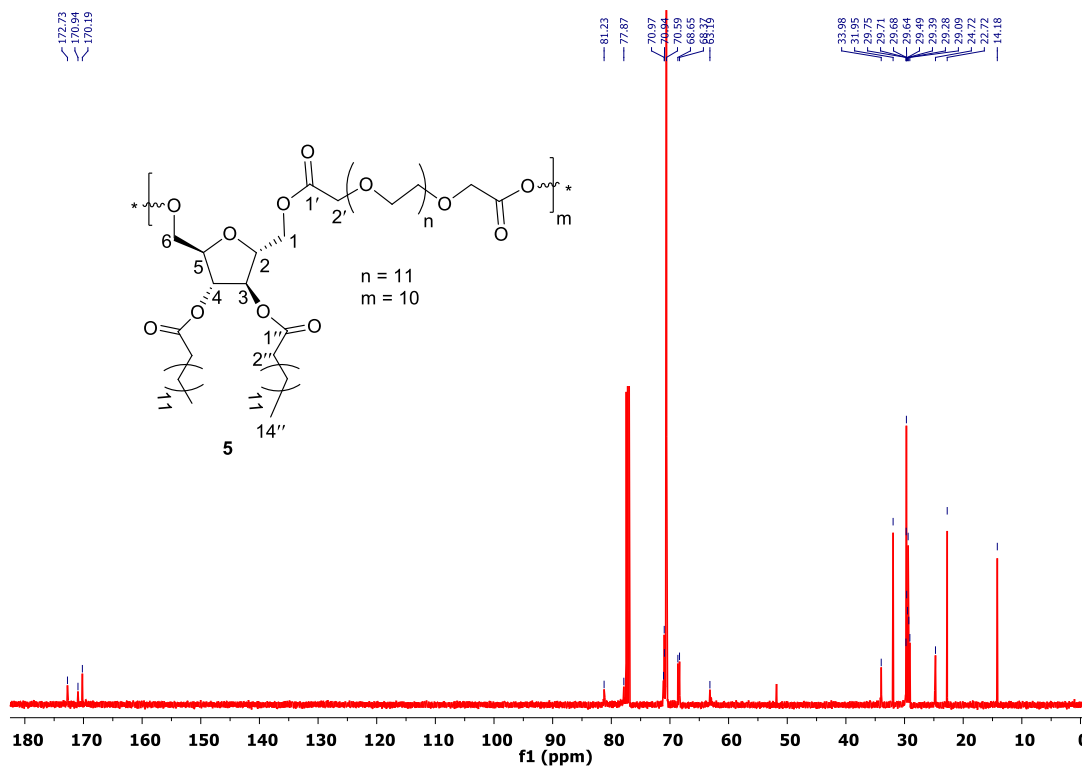

Figure S10.  $^{13}\text{C}$  NMR spectrum (125 MHz,  $\text{CDCl}_3$ ) of copolymer 5.

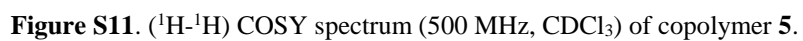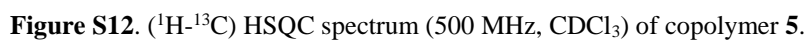

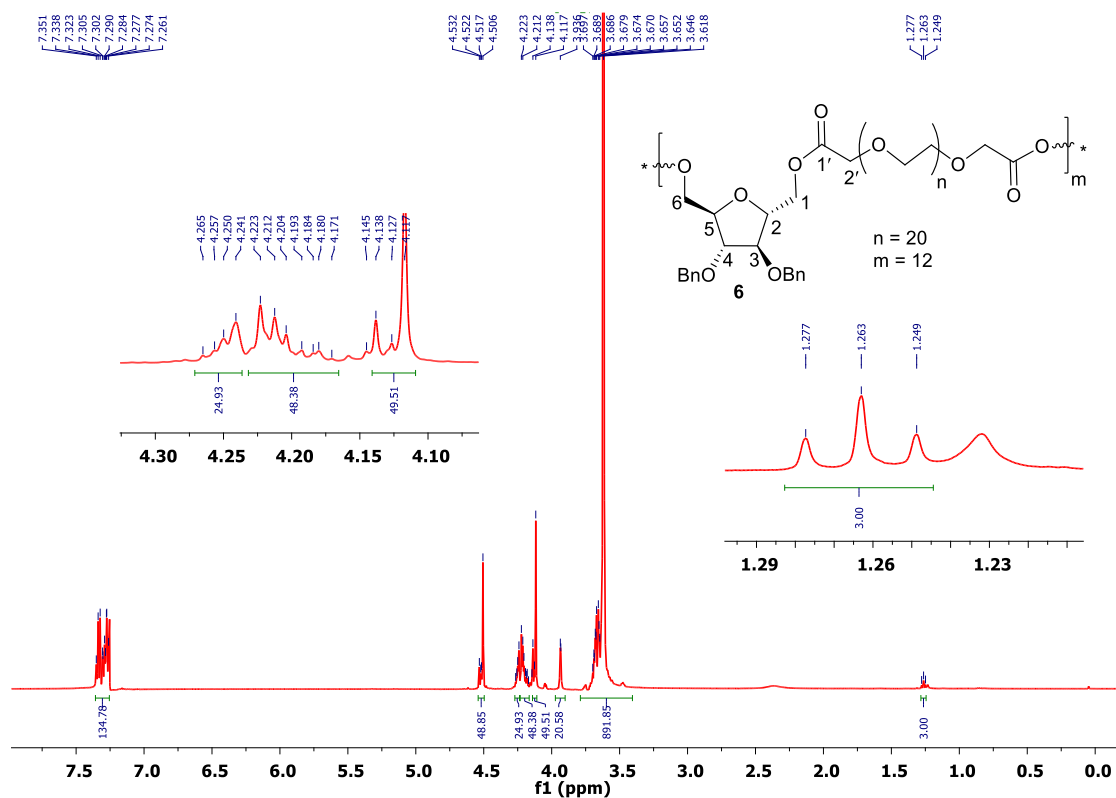

Figure S13.  $^1\text{H}$  NMR spectrum (500 MHz,  $\text{CDCl}_3$ ) of copolymer **6**.

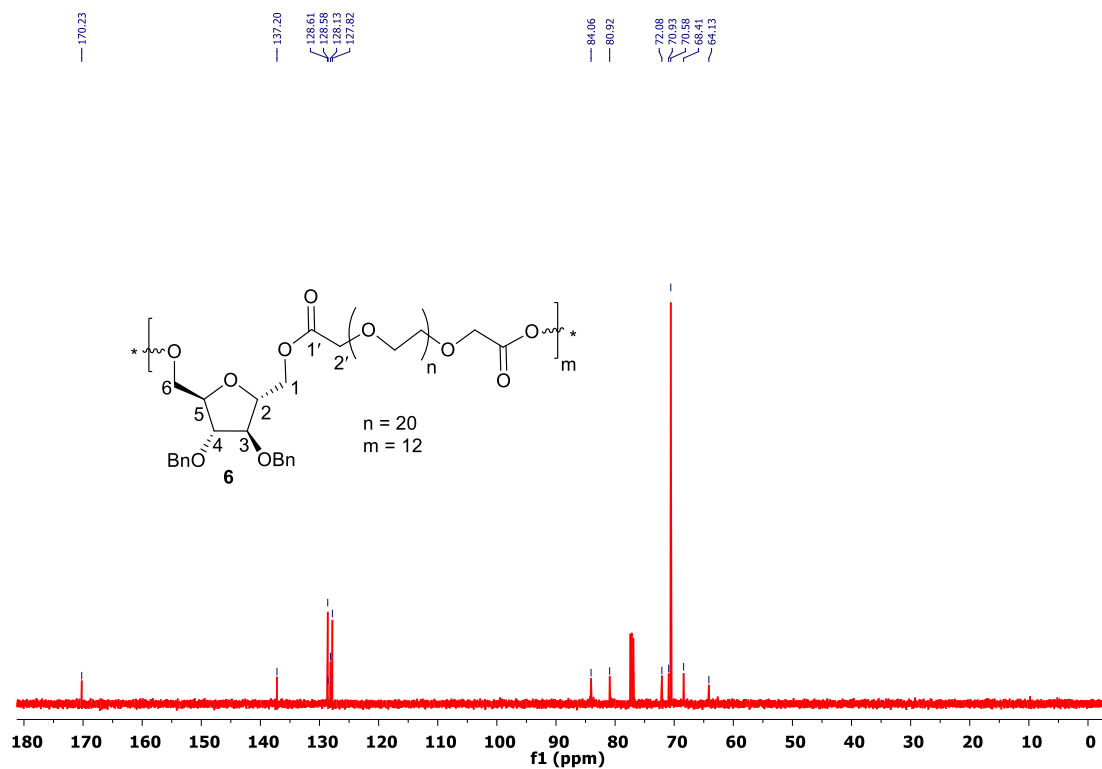

Figure S14.  $^{13}\text{C}$  NMR spectrum (125 MHz,  $\text{CDCl}_3$ ) of copolymer **6**.



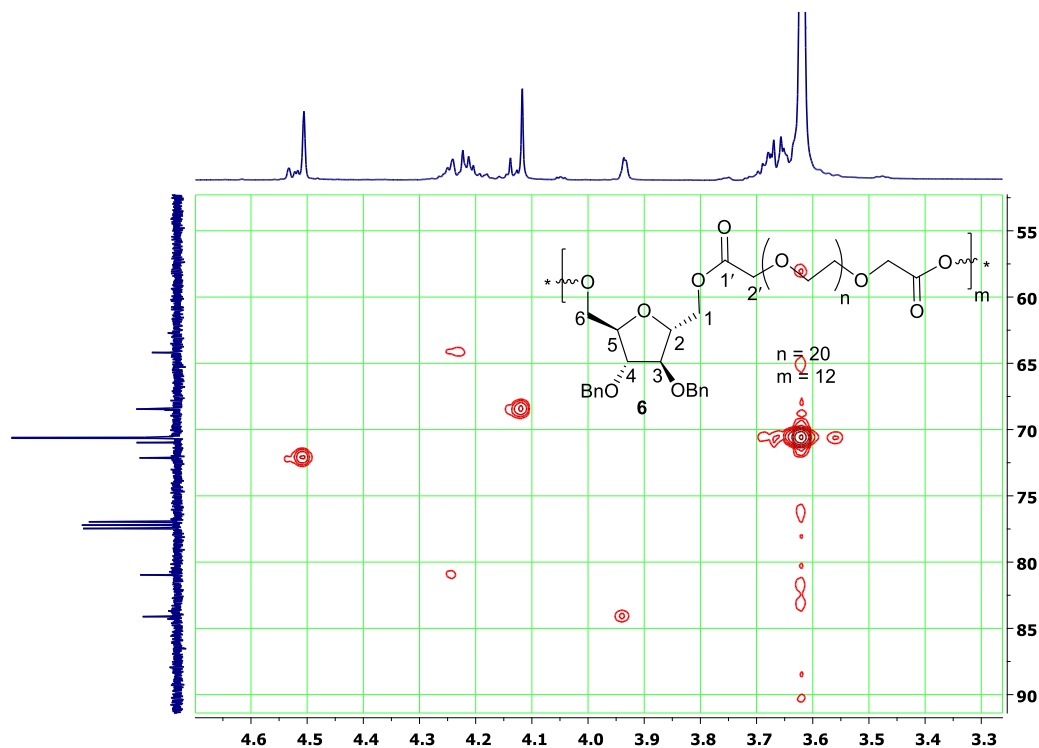

Figure S15. ( $^1\text{H}$ - $^{13}\text{C}$ ) HSQC spectrum (500 MHz,  $\text{CDCl}_3$ ) of copolymer **6**.

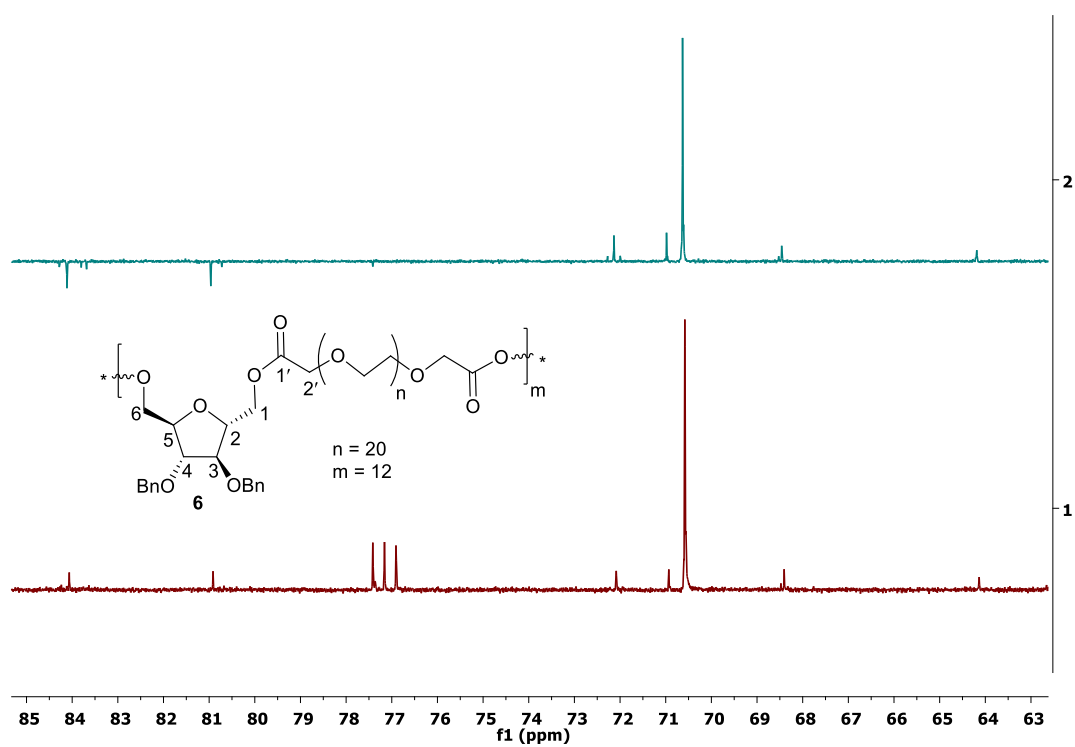

Figure S16. DEPT-135 NMR spectrum (125 MHz,  $\text{CDCl}_3$ ) of copolymer **6**.



**Table S1.** Number average molecular weight ( $M_n$ ) of copolymers **3-7** by GPC and  $^1\text{H}$  NMR spectra.

| Copolymer | $M_n$ (GPC)<br>(g/mol) | $M_n$ ( $^1\text{H}$ NMR)<br>(g/mol) | PDI  |
|-----------|------------------------|--------------------------------------|------|
| <b>3</b>  | 7893                   | 7460                                 | 1.17 |
| <b>4</b>  | 5757                   | -                                    | 1.59 |
| <b>5</b>  | 4264                   | -                                    | 1.27 |
| <b>6</b>  | 12485                  | 15336                                | 1.20 |
| <b>7</b>  | 8502                   | 10920                                | 1.24 |

**Table S2.** Zeta-potential of Nile red and ICG loaded micelles.

| Copolymer | Zeta potential of<br>polymeric micelles<br>(mV) | Zeta potential of<br>Nile red loaded micelles<br>(mV) | Zeta potential of ICG<br>loaded micelles<br>(mV) |
|-----------|-------------------------------------------------|-------------------------------------------------------|--------------------------------------------------|
| <b>4</b>  | $-15.9 \pm 1.4$                                 | $-4.36 \pm 2.7$                                       | $-1.64 \pm 0.5$                                  |
| <b>5</b>  | $-16.3 \pm 2.0$                                 | $8.17 \pm 0.8$                                        | $-3.44 \pm 0.9$                                  |

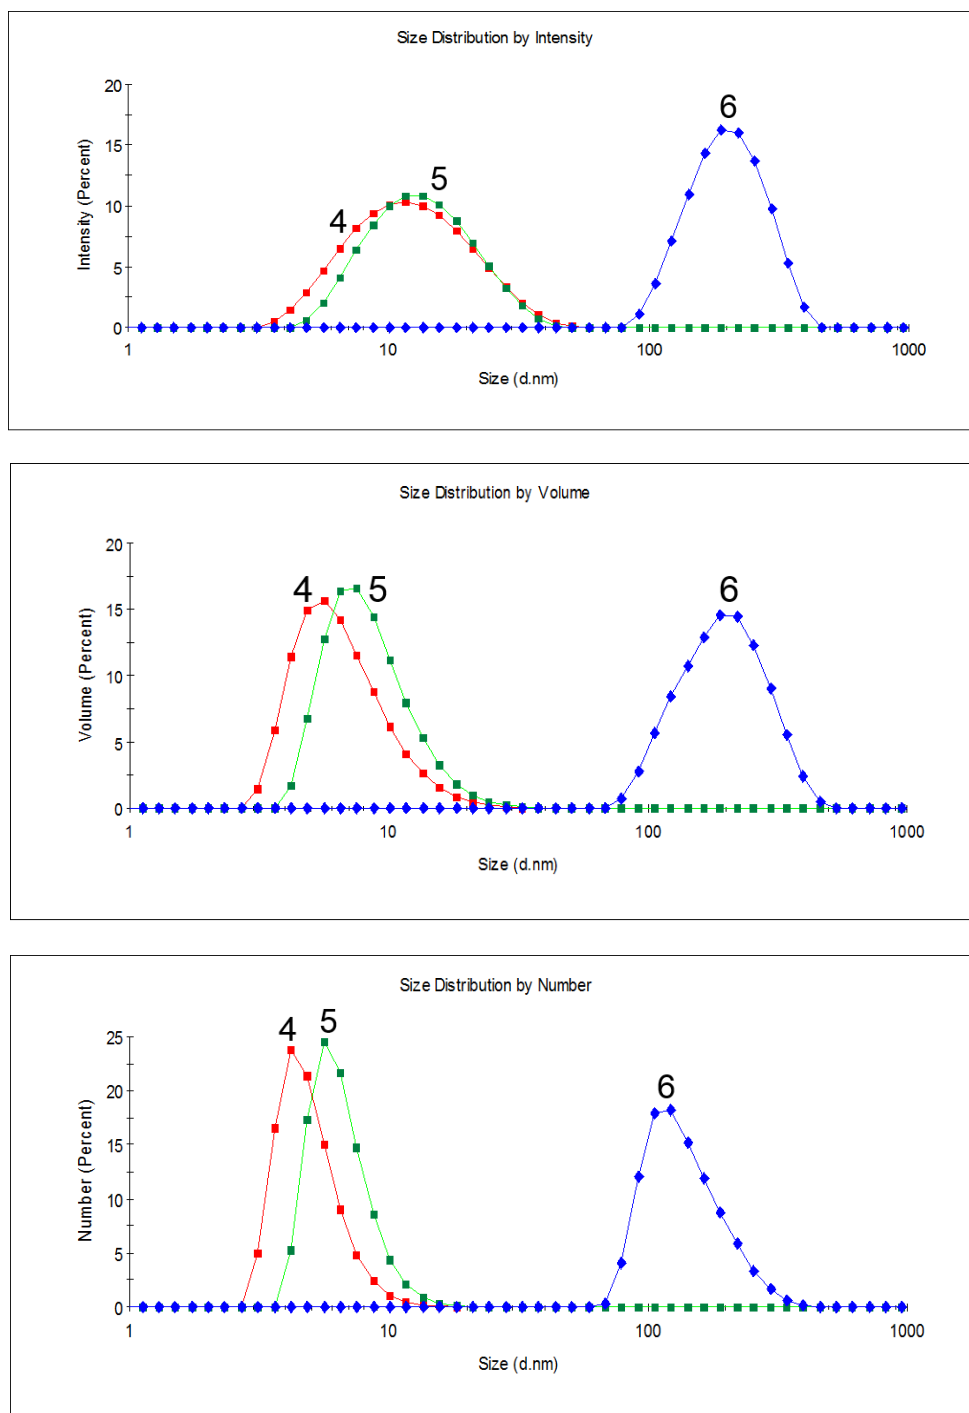

**Figure S19.** Size distribution of aggregates of copolymers **4-6** in aqueous solution.

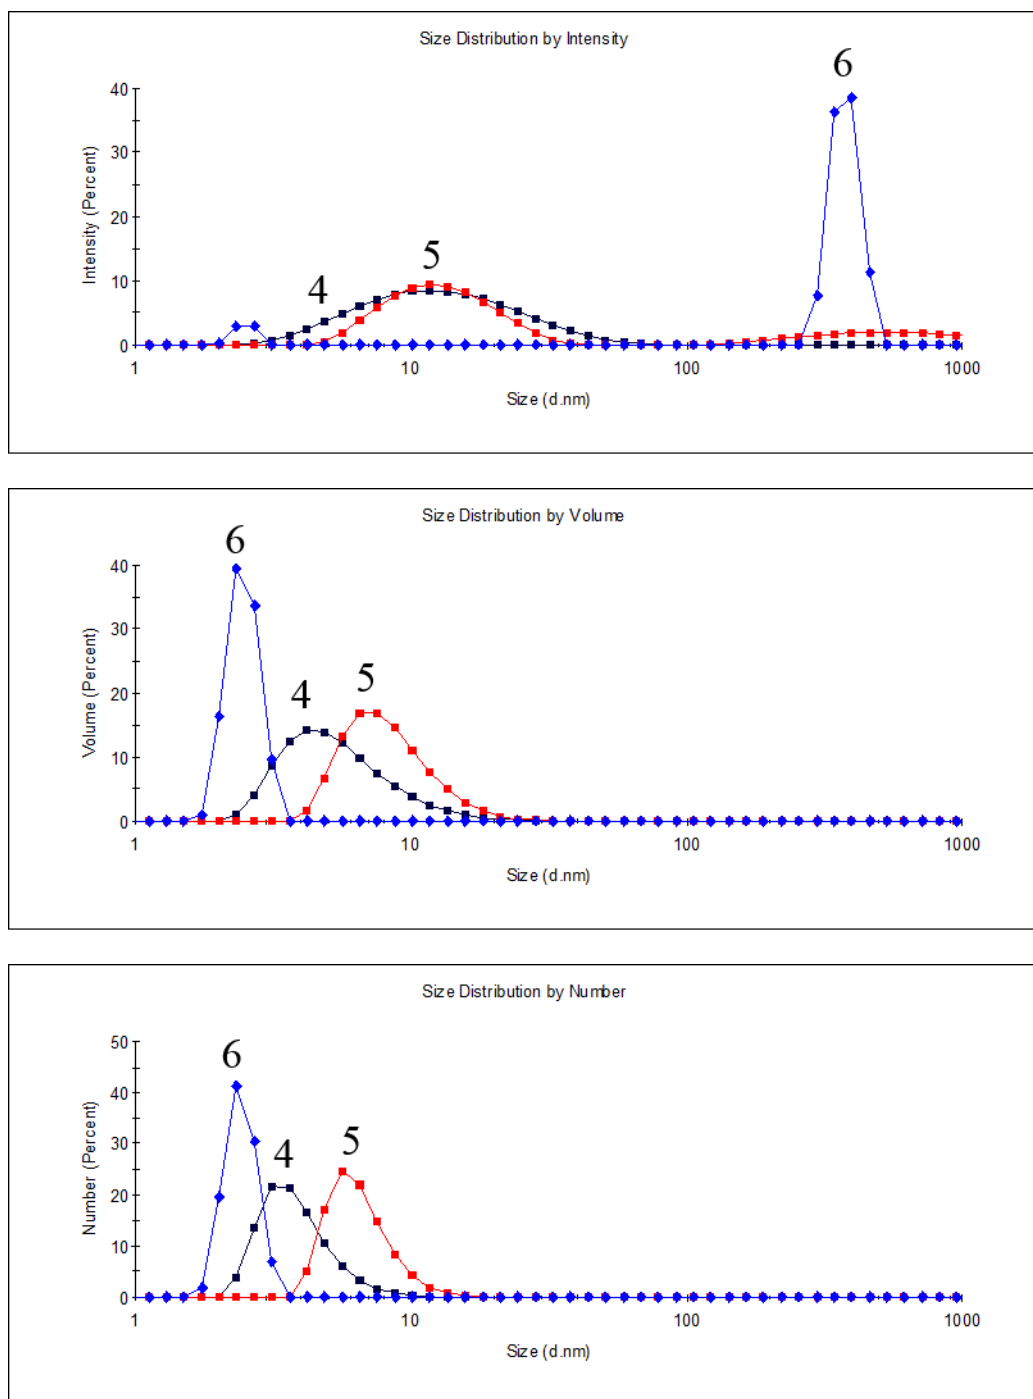

**Figure S20.** Size distribution of aggregates of copolymers **4-6** after encapsulation of ICG in aqueous solution.

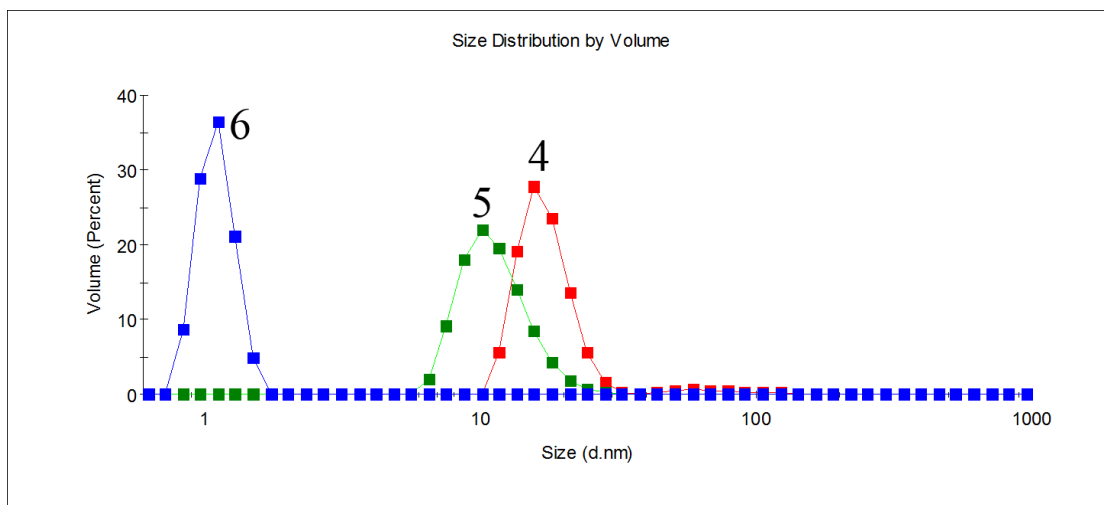

**Figure S21.** Size distribution of aggregates of copolymers **4-6** after 15 days incubation at 37 °C in aqueous solution.

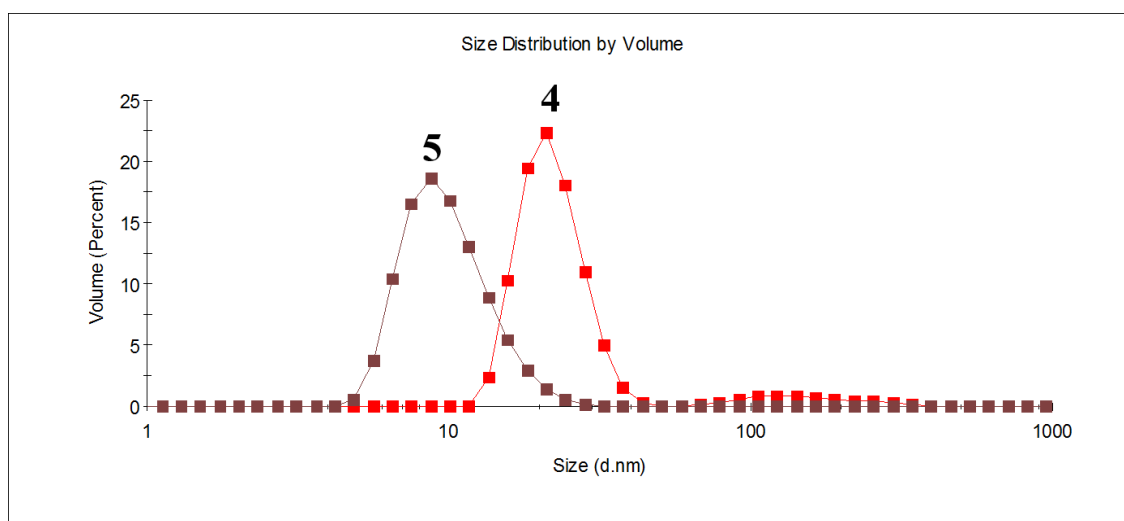

**Figure S22.** Size distribution of aggregates of copolymers **4** and **5** after encapsulation of Nile red in aqueous solution.

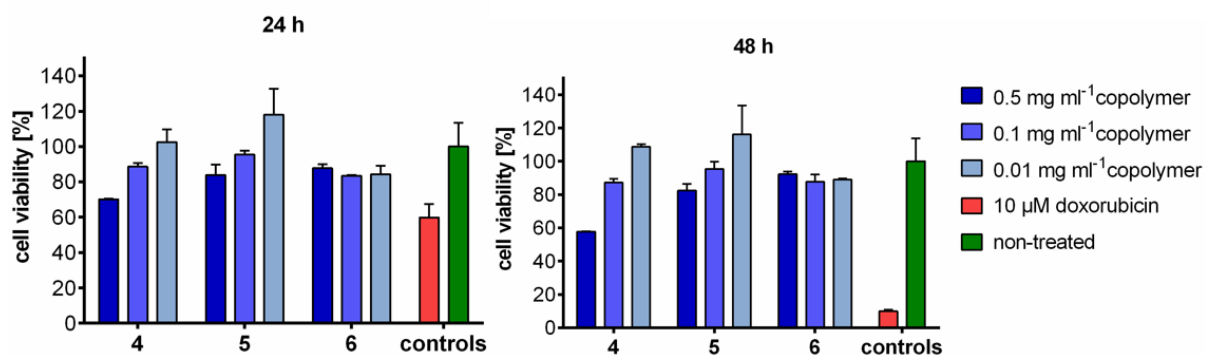

**Figure 23.** Cytotoxicity data of copolymers **4**, **5**, and **6** with doxorubicin as control.

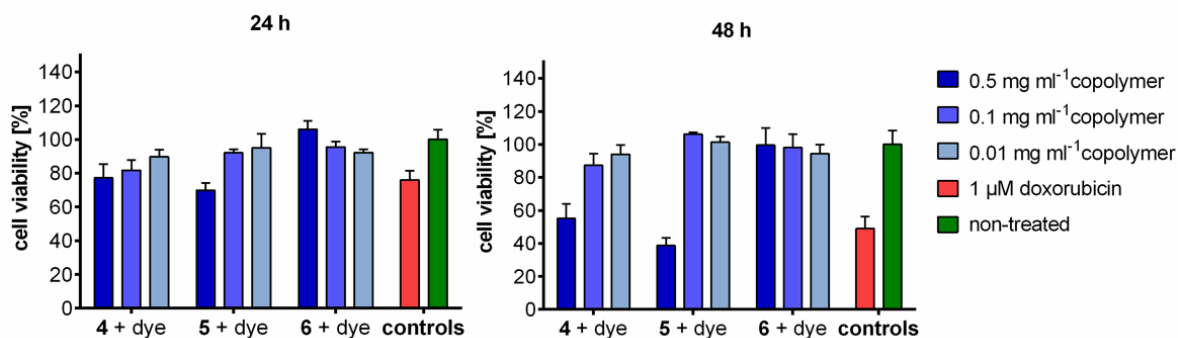

**Figure 24.** Cytotoxicity data of ICG-loaded copolymers **4**, **5**, and **6** with doxorubicin as control.

**Figure S25.** Gel permeation chromatogram of copolymer **3**.

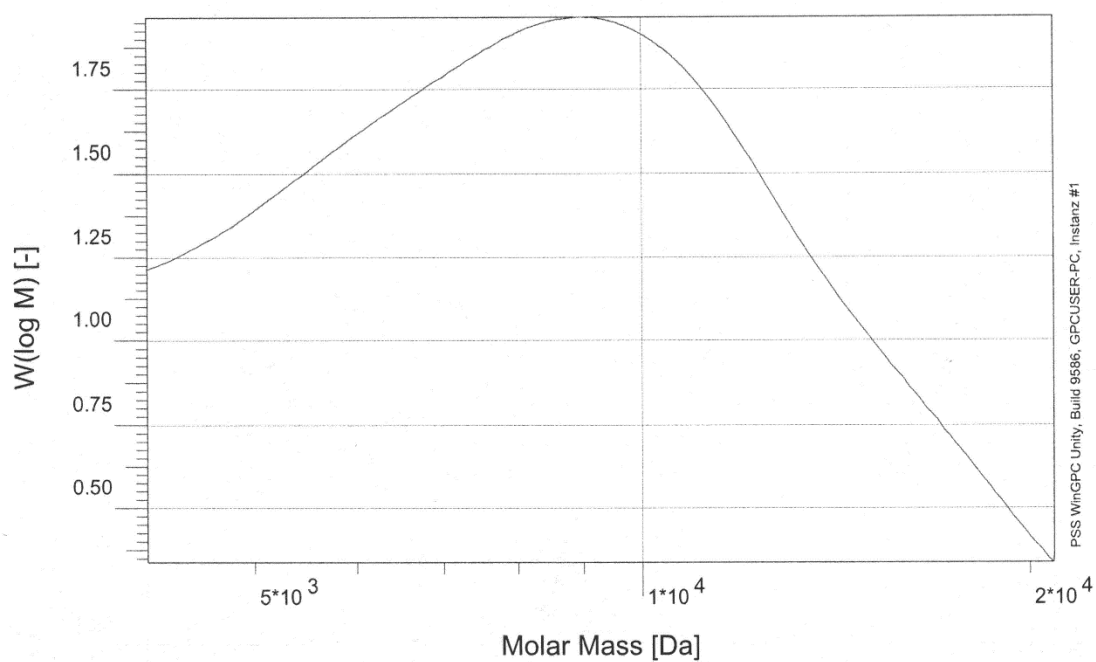

$$M_w = 9258 \text{ g/mol}, M_n = 7893 \text{ g/mol}, M_z = 10824 \text{ g/mol}, D = 1.1$$

Detector: RI, Eluent = THF, Flow rate = 1 mL/min, Standard = Polystyrol

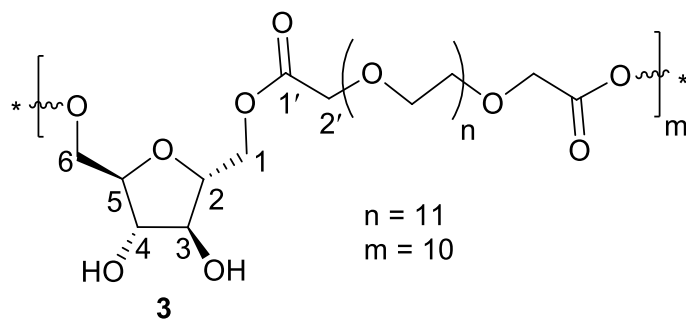



**Figure S26.** Gel permeation chromatogram of polymer **4**.

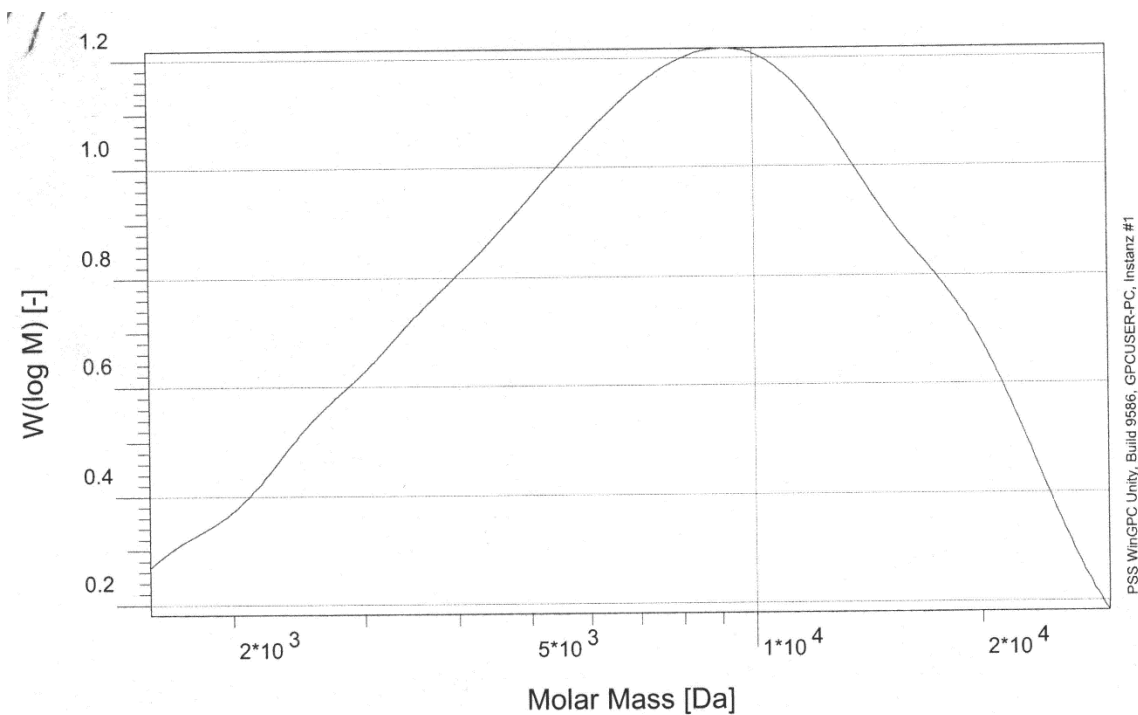

$$M_w = 9200 \text{ g/mol}, M_n = 5757 \text{ g/mol}, M_z = 13173 \text{ g/mol}, D = 1.5$$

Detector: RI, Eluent = THF, Flow rate = 1 mL/min, Standard = Polystyrol

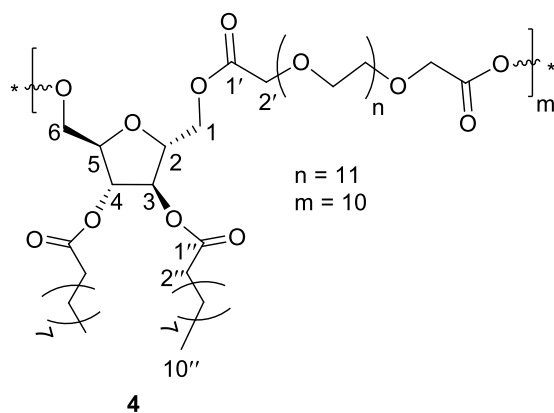

**Figure S27.** Gel permeation chromatogram of copolymer **5**.

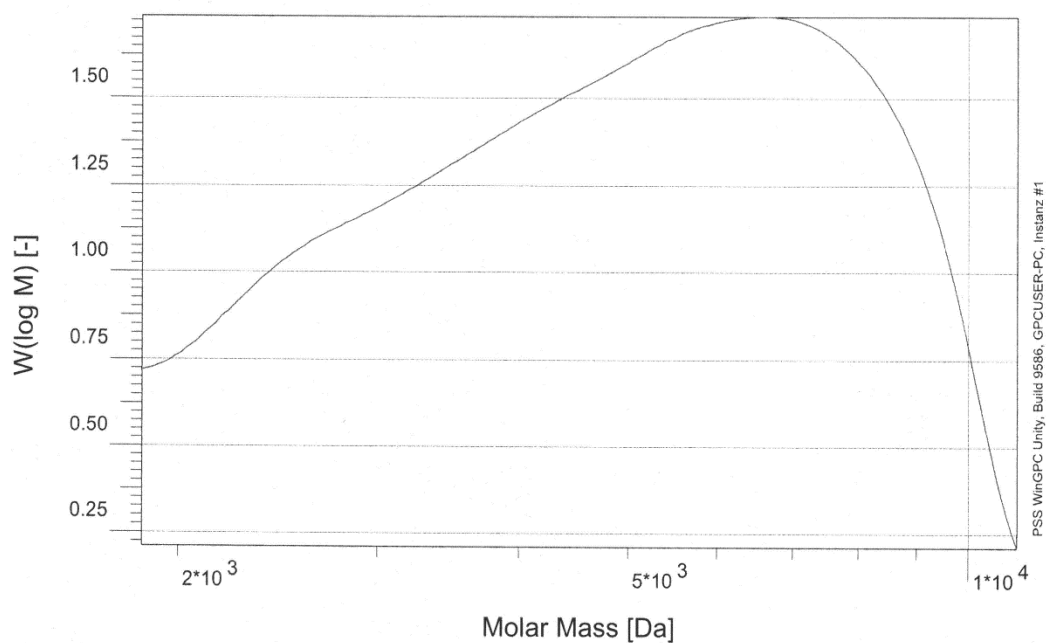

$$M_w = 5239 \text{ g/mol}, M_n = 4264 \text{ g/mol}, M_z = 6219 \text{ g/mol}, D = 1.2$$

Detector: RI, Eluent = THF, Flow rate = 1 mL/min, Standard = Polystyrol

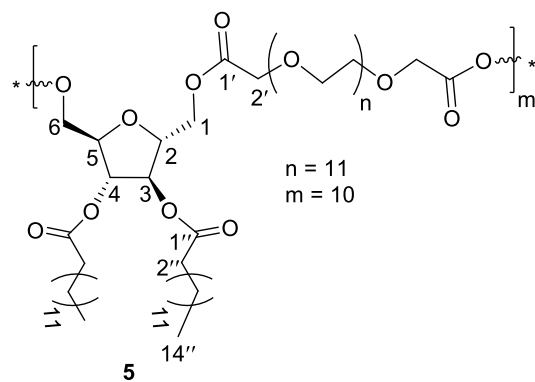

**Figure S28.** Gel permeation chromatogram of copolymer **6**.

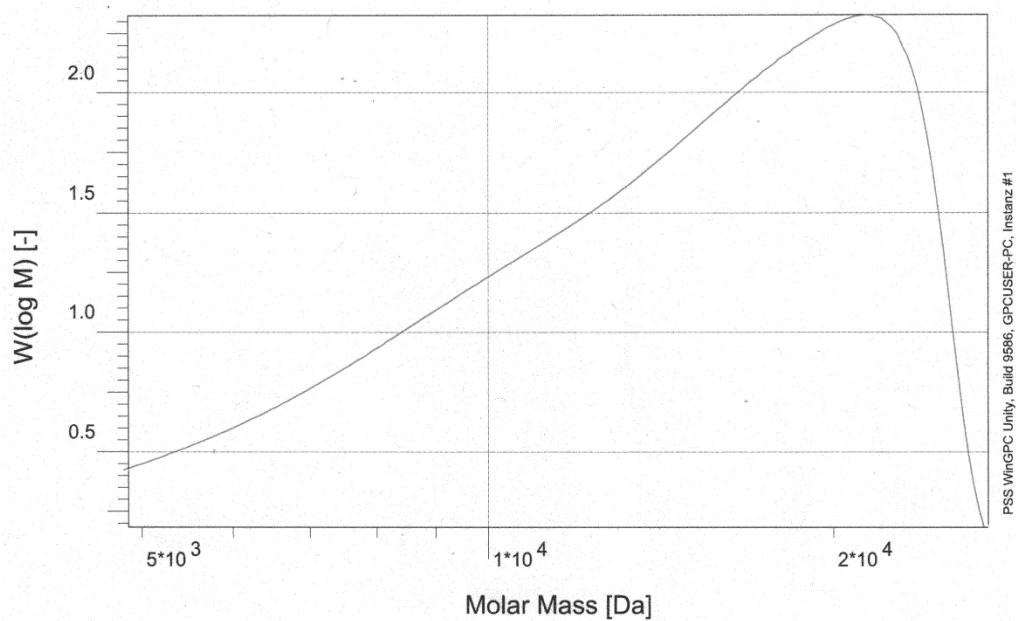

$$M_w = 14987 \text{ g/mol}, M_n = 12485 \text{ g/mol}, M_z = 17182 \text{ g/mol}, D = 1.2$$

Detector: RI, Eluent = THF, Flow rate = 1 mL/min, Standard = Polystyrol

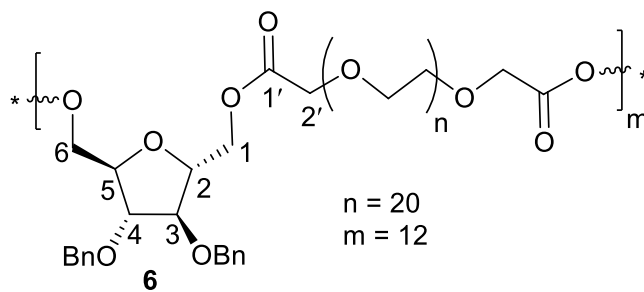

**Figure S29.** Gel permeation chromatogram of copolymer **7**.

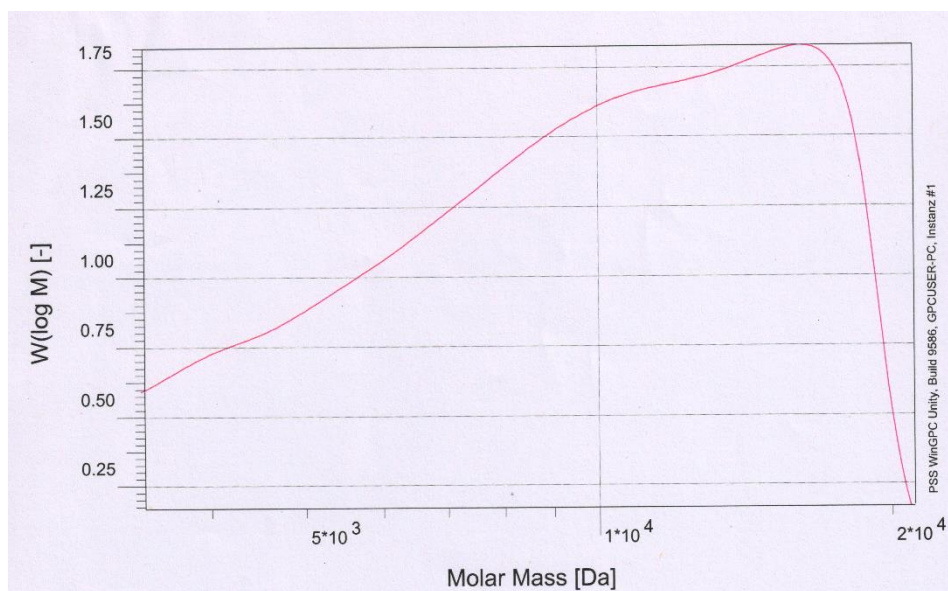

$$M_w = 10573 \text{ g/mol}, M_n = 8502 \text{ g/mol}, M_z = 12525 \text{ g/mol}, D = 1.24$$

Detector: RI, Eluent = THF, Flow rate = 1 mL/min, Standard = Polystyrol

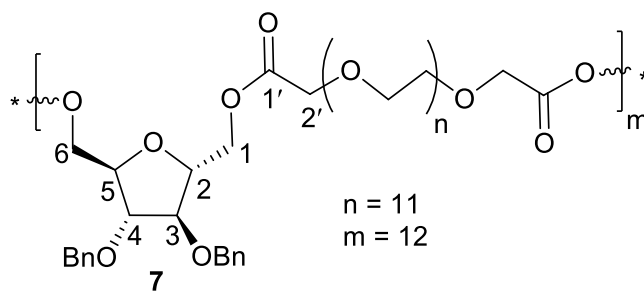

Supplement: c7ra04994c1.pdf [file c7ra04994c1.pdf]
